# Supplementary material
Source: publisher figshare collection journal article supplement (https://geolsoc.figshare.com/ndownloader/files/5422616)
Supplement: Supplementary file 1 [file 5422616]

Table 2
LA-MC-ICPMS Lu-Hf isotope data of zircon from sample �..
	176Yb/177Hf a	�2s	176Lu/177Hf a	�2s	178Hf/177Hf	180Hf/177Hf	SigHf b	176Hf/177Hf	�2s c	176Hf/177Hf(t)d	eHf(t) d	�2s c	TNC e	age f	�2s
							(V)						(Ga)	(Ma)
10Ca18a_4	0.0151	12	0.00048	3.0	1.46721	1.88670	12	0.281598	18	0.281593	-30.0	0.7	2.78	547	9
10Ca18a_6	0.0303	25	0.00107	6.7	1.46717	1.88684	12	0.282349	22	0.282339	-4.4	0.8	1.36	508	9
10Ca18a_8	0.0439	41	0.00137	11.1	1.46722	1.88665	16	0.281535	25	0.281482	0.1	0.9	2.37	2042	20
10Ca18a_10	0.0140	15	0.00051	5.5	1.46719	1.88678	17	0.281763	15	0.281749	-2.7	0.5	2.09	1507	33
10Ca18a_22	0.0622	62	0.00196	15.5	1.46714	1.88698	12	0.281977	25	0.281931	-2.3	0.9	1.85	1243	16
10Ca18a_26	0.0316	45	0.00106	13.2	1.46723	1.88663	12	0.282297	20	0.282282	-0.6	0.7	1.36	768	15
10Ca18a_31	0.0646	61	0.00216	19.5	1.46720	1.88673	12	0.281120	28	0.281008	-1.3	1.0	2.99	2706	13
10Ca18a_32	0.0284	85	0.00087	16.9	1.46720	1.88673	14	0.281776	19	0.281751	-2.7	0.7	2.08	1506	29
10Ca18a_33	0.0241	26	0.00069	5.5	1.46713	1.88701	8	0.281957	32	0.281937	4.3	1.1	1.71	1523	24
10Ca18a_38	0.0253	21	0.00098	6.1	1.46715	1.88694	15	0.281612	17	0.281572	5.4	0.6	2.15	2133	20
10Ca18a_39	0.0194	16	0.00064	4.1	1.46721	1.88668	14	0.282430	19	0.282423	1.0	0.7	1.15	619	12
10Ca18a_40	0.0553	56	0.00175	13.8	1.46714	1.88697	11	0.281672	30	0.281603	5.1	1.0	2.12	2073	21
10Ca18a_42	0.0155	13	0.00048	2.9	1.46722	1.88664	14	0.282268	24	0.282264	-7.2	0.9	1.51	505	9
10Ca18a_43	0.0143	12	0.00049	3.1	1.46721	1.88668	16	0.281516	17	0.281498	0.0	0.6	2.35	2015	32
10Ca18a_44	0.0201	17	0.00066	4.0	1.46717	1.88683	16	0.281660	16	0.281638	-1.2	0.6	2.20	1747	23
10Ca18a_45	0.0165	18	0.00070	8.3	1.46721	1.88668	17	0.282442	27	0.282433	2.5	1.0	1.11	672	12
10Ca18a_48	0.0855	120	0.00251	22.8	1.46722	1.88666	12	0.282639	22	0.282613	6.1	0.8	0.81	546	9
10Ca18a_49	0.0263	23	0.00095	6.5	1.46721	1.88669	14	0.282378	17	0.282369	-3.3	0.6	1.30	512	9
10Ca18a_60	0.0216	19	0.00076	5.1	1.46721	1.88669	11	0.282214	17	0.282196	6.4	0.6	1.34	1213	26
10Ca18a_61	0.0248	25	0.00084	7.1	1.46718	1.88680	17	0.281627	16	0.281595	3.6	0.6	2.16	2022	25
10Ca18a_62	0.0066	5	0.00022	1.4	1.46722	1.88666	14	0.281221	20	0.281219	-43.6	0.7	3.49	532	8
10Ca18a_63	0.0155	19	0.00062	6.6	1.46718	1.88681	16	0.281726	25	0.281702	8.7	0.9	1.92	2075	25
10Ca18a_64	0.0132	11	0.00040	2.4	1.46718	1.88680	14	0.281584	19	0.281568	4.0	0.7	2.18	2078	21
10Ca18a_67	0.0377	31	0.00136	8.4	1.46721	1.88670	13	0.282385	22	0.282369	-1.1	0.8	1.26	610	10
10Ca18a_71	0.1376	132	0.00382	28.5	1.46718	1.88681	13	0.281504	16	0.281317	6.1	0.6	2.45	2553	25
10Ca18a_73	0.0292	29	0.00091	7.2	1.46714	1.88697	10	0.282101	34	0.282075	8.1	1.2	1.46	1475	33
10Ca18a_77	0.0268	23	0.00093	6.3	1.46721	1.88669	13	0.281689	19	0.281653	6.3	0.7	2.03	2046	25
10Ca18a_80	0.0101	8	0.00034	2.0	1.46717	1.88687	13	0.281574	17	0.281565	-10.7	0.6	2.47	1443	35
10Ca18a_81	0.0217	18	0.00068	4.4	1.46716	1.88688	13	0.282057	22	0.282050	-14.2	0.8	1.91	532	8
10Ca18a_82	0.0216	18	0.00078	5.1	1.46719	1.88678	10	0.281715	26	0.281686	5.3	0.9	2.01	1953	40
10Ca18a_83	0.0205	19	0.00069	5.0	1.46717	1.88683	10	0.281277	28	0.281241	6.4	1.0	2.54	2680	13
10Ca18a_84	0.0189	18	0.00068	5.6	1.46719	1.88678	14	0.281144	14	0.281122	-19.1	0.5	3.19	1766	33
10Ca18a_87	0.0173	15	0.00058	4.4	1.46720	1.88674	10	0.282556	32	0.282550	4.0	1.1	0.93	554	10
10Ca18a_88	0.0281	27	0.00091	7.5	1.46717	1.88687	12	0.281743	23	0.281709	5.5	0.8	1.97	1925	40
10Ca18a_89	0.0180	18	0.00060	4.8	1.46720	1.88674	13	0.282491	18	0.282484	2.9	0.7	1.04	606	11
10Ca18a_94	0.0221	18	0.00074	4.5	1.46722	1.88664	15	0.282050	15	0.282033	1.0	0.5	1.65	1229	32
10Ca18a_96	0.0399	33	0.00140	8.7	1.46719	1.88679	15	0.282165	18	0.282144	-4.3	0.6	1.61	824	15
10Ca18a_97	0.0533	47	0.00174	12.5	1.46723	1.88664	11	0.281768	20	0.281748	-22.9	0.7	2.46	618	12
10Ca18a_98	0.0289	32	0.00099	8.6	1.46716	1.88687	11	0.282326	25	0.282315	-3.5	0.9	1.37	586	10
10Ca18a_99	0.0395	37	0.00143	10.9	1.46719	1.88677	12	0.282378	20	0.282364	-3.3	0.7	1.31	520	10
10Ca18a_100	0.0277	25	0.00091	6.0	1.46720	1.88673	12	0.281612	18	0.281575	6.1	0.7	2.13	2160	18
10Ca18a_101	0.0484	71	0.00161	20.2	1.46714	1.88696	12	0.282354	25	0.282337	-3.5	0.9	1.35	553	10
10Ca18a_128	0.0229	20	0.00079	5.8	1.46715	1.88691	11	0.281367	21	0.281336	-4.9	0.7	2.65	2048	19
10Ca18b_103	0.0155	21	0.00056	6.5	1.46722	1.88666	13	0.282446	17	0.282439	2.1	0.6	1.11	641	12
10Ca18b_105	0.0202	16	0.00071	4.5	1.46718	1.88680	12	0.282597	18	0.282590	5.9	0.6	0.84	572	10
10Ca18b_106	0.0139	12	0.00050	3.3	1.46717	1.88684	12	0.281699	18	0.281685	-4.7	0.6	2.21	1522	25
10Ca18b_110	0.0178	14	0.00059	3.6	1.46721	1.88668	10	0.282097	26	0.282084	2.1	0.9	1.57	1200	46
10Ca18b_114	0.0229	18	0.00085	5.1	1.46720	1.88675	10	0.282593	20	0.282584	5.7	0.7	0.85	576	9
10Ca18b_117	0.0172	16	0.00065	4.7	1.46717	1.88684	11	0.281738	19	0.281719	-4.0	0.7	2.15	1499	25
10Ca18b_123	0.0083	8	0.00029	2.3	1.46722	1.88664	12	0.281010	18	0.280995	-1.2	0.6	3.00	2730	20
10Ca18b_127	0.0012	1	0.00003	0.3	1.46719	1.88676	14	0.282240	20	0.282240	-5.0	0.7	1.50	642	10
10Ca18b_130	0.0125	11	0.00048	3.3	1.46716	1.88688	10	0.282495	20	0.282490	3.0	0.7	1.03	602	10
10Ca18b_131	0.0295	26	0.00105	7.6	1.46716	1.88690	10	0.282579	22	0.282568	5.2	0.8	0.89	575	10
10Ca18b_132	0.0186	17	0.00064	4.7	1.46722	1.88665	11	0.282478	17	0.282470	3.1	0.6	1.05	635	11
10Ca18b_134	0.0361	31	0.00114	7.2	1.46718	1.88682	10	0.281675	20	0.281635	1.6	0.7	2.15	1874	19
10Ca18b_137	0.0125	10	0.00046	2.9	1.46714	1.88696	11	0.282479	18	0.282474	2.6	0.6	1.05	611	11
10Ca18b_138	0.0182	16	0.00070	4.5	1.46714	1.88695	10	0.282477	20	0.282468	3.2	0.7	1.05	647	10
10Ca18b_139	0.0068	6	0.00027	1.7	1.46717	1.88684	12	0.281596	22	0.281586	0.9	0.8	2.22	1919	14
10Ca18b_140	0.0164	14	0.00057	3.6	1.46716	1.88687	11	0.282563	16	0.282557	4.3	0.6	0.92	553	10
10Ca20_4	0.0406	37	0.00148	10.1	1.46719	1.88676	11	0.282155	27	0.282116	8.0	0.9	1.41	1410	34
10Ca20_15	0.0312	33	0.00118	11.4	1.46716	1.88688	8	0.281672	29	0.281627	4.0	1.0	2.11	1986	45
10Ca20_21	0.0122	12	0.00044	3.5	1.46719	1.88677	15	0.282477	19	0.282472	2.7	0.7	1.06	616	11
10Ca20_22	0.0512	48	0.00164	13.2	1.46715	1.88694	22	0.282335	20	0.282311	0.5	0.7	1.31	773	14
10Ca20_32	0.0310	36	0.00117	12.8	1.46722	1.88664	9	0.282579	24	0.282566	5.3	0.9	0.88	584	10
10Ca20_33	0.0442	38	0.00140	8.8	1.46722	1.88666	15	0.282196	28	0.282165	4.7	1.0	1.41	1189	23
10Ca20_35	0.0372	111	0.00143	42.0	1.46718	1.88680	15	0.281797	24	0.281747	4.8	0.8	1.94	1840	20
10Ca20_41	0.0192	17	0.00070	4.8	1.46717	1.88685	15	0.282475	19	0.282467	2.5	0.7	1.07	614	10
10Ca20_48	0.0366	32	0.00120	8.4	1.46716	1.88690	16	0.281728	26	0.281688	1.5	0.9	2.08	1787	20
10Ca20_49	0.0388	58	0.00144	18.1	1.46722	1.88667	13	0.282417	27	0.282402	-1.1	1.0	1.22	558	9
10Ca20_54	0.0270	25	0.00095	7.9	1.46718	1.88680	13	0.281938	25	0.281908	6.3	0.9	1.71	1656	20
10Ca20_61	0.0345	32	0.00122	9.9	1.46718	1.88682	10	0.282584	21	0.282571	4.8	0.8	0.89	552	13
10Ca20_63	0.0286	24	0.00100	6.7	1.46721	1.88671	14	0.282477	22	0.282467	0.9	0.8	1.10	544	10
10Ca20_73	0.0450	37	0.00155	10.2	1.46717	1.88684	10	0.282500	27	0.282484	1.6	0.9	1.06	550	22
10Ca20_75	0.0212	19	0.00077	5.8	1.46718	1.88681	10	0.282146	22	0.282129	3.9	0.8	1.48	1207	36
10Ca20_77	0.0689	193	0.00182	40.9	1.46714	1.88696	13	0.281928	29	0.281868	6.5	1.0	1.75	1725	24
10Ca20_80	0.0239	25	0.00095	9.0	1.46716	1.88688	11	0.281878	25	0.281850	1.7	0.9	1.87	1542	22
10Ca20_83	0.0328	27	0.00120	8.8	1.46718	1.88680	11	0.281797	28	0.281757	3.0	1.0	1.96	1743	25
10Ca20_84	0.0223	22	0.00075	6.2	1.46718	1.88680	14	0.282574	26	0.282566	4.7	0.9	0.90	559	12
10Ca20_99	0.0353	29	0.00122	8.8	1.46717	1.88685	12	0.281765	25	0.281724	1.8	0.9	2.03	1742	20
10Ca20_101	0.0173	21	0.00061	6.9	1.46714	1.88695	10	0.281943	20	0.281926	1.8	0.7	1.77	1431	47
10Ca20_104	0.0249	20	0.00085	5.3	1.46715	1.88692	11	0.280837	21	0.280793	-9.0	0.8	3.41	2702	20
10Ca20_106	0.0179	17	0.00055	3.7	1.46717	1.88686	17	0.281330	22	0.281310	-9.1	0.8	2.76	1910	57
10Ca20_110	0.0201	17	0.00064	4.5	1.46714	1.88698	15	0.282427	22	0.282420	-0.3	0.8	1.18	565	11
10Ca20_111	0.0221	24	0.00076	7.3	1.46717	1.88685	17	0.282062	23	0.282045	1.2	0.8	1.64	1218	38
10Ca20_114	0.0207	20	0.00076	7.1	1.46713	1.88699	15	0.281658	28	0.281633	-1.0	1.0	2.20	1762	25
10Ca20_117	0.0270	25	0.00095	7.9	1.46718	1.88680	13	0.281938	28	0.281908	5.9	1.0	1.72	1636	26
10Ca29a_4	0.0048	4	0.00015	1.2	1.46717	1.88684	12	0.282234	26	0.282231	4.0	0.9	1.34	1052	15
10Ca29a_7	0.0342	37	0.00111	10.7	1.46718	1.88683	11	0.282227	25	0.282213	-5.2	0.9	1.54	673	15
10Ca29a_9	0.0340	28	0.00110	6.6	1.46716	1.88690	11	0.282165	21	0.282151	-7.4	0.8	1.66	672	14
10Ca29a_10	0.0308	25	0.00114	7.1	1.46715	1.88694	12	0.282458	21	0.282444	2.9	0.8	1.09	670	15
10Ca29a_11	0.0457	37	0.00165	10.6	1.46716	1.88688	10	0.282474	24	0.282453	3.3	0.9	1.07	671	14
10Ca29a_12	0.0342	51	0.00126	16.0	1.46718	1.88681	11	0.282467	22	0.282452	2.5	0.8	1.09	640	17
10Ca29a_13	0.0567	67	0.00186	20.7	1.46717	1.88683	12	0.282371	22	0.282347	-0.1	0.8	1.27	688	16
10Ca29a_14	0.0482	76	0.00162	24.4	1.46716	1.88690	9	0.282328	27	0.282307	-1.5	1.0	1.35	688	16
10Ca29a_16	0.0491	83	0.00162	24.4	1.46721	1.88668	11	0.282335	27	0.282314	-1.1	0.9	1.33	694	16
10Ca29a_17	0.0330	30	0.00112	7.9	1.46722	1.88664	8	0.282033	25	0.282002	5.6	0.9	1.60	1478	18
10Ca29a_28	0.0234	20	0.00087	5.6	1.46719	1.88676	11	0.281909	18	0.281885	1.2	0.6	1.84	1469	20
10Ca29a_35	0.0279	28	0.00107	8.0	1.46717	1.88684	10	0.282485	23	0.282474	1.1	0.8	1.08	544	15
10Ca29a_36	0.0138	11	0.00046	2.8	1.46719	1.88676	10	0.282123	24	0.282113	2.6	0.9	1.52	1177	32
10Ca29a_37	0.0244	27	0.00084	7.6	1.46722	1.88664	11	0.281898	21	0.281873	3.0	0.7	1.82	1567	23
10Ca29a_38	0.0219	20	0.00081	5.7	1.46716	1.88689	11	0.282422	24	0.282413	1.2	0.9	1.16	645	15
10Ca29a_42	0.0246	30	0.00085	10.0	1.46713	1.88699	12	0.282285	23	0.282272	-1.0	0.8	1.38	769	19
10Ca29a_44	0.0423	86	0.00146	26.6	1.46720	1.88675	9	0.282121	26	0.282080	8.5	0.9	1.45	1485	28
10Ca29a_50	0.0220	24	0.00090	9.5	1.46722	1.88664	12	0.282417	24	0.282404	3.8	0.9	1.12	774	16
10Ca29a_52	0.0270	27	0.00099	9.1	1.46711	1.88707	11	0.282221	26	0.282209	-5.8	0.9	1.55	652	15
10Ca29b_59	0.0129	10	0.00045	2.7	1.46712	1.88704	15	0.282204	16	0.282198	-5.7	0.6	1.57	675	15
10Ca29b_60	0.0382	48	0.00122	12.0	1.46716	1.88688	15	0.282028	24	0.281990	8.5	0.8	1.56	1626	23
10Ca29b_61	0.0268	25	0.00092	7.1	1.46710	1.88691	15	0.282193	15	0.282182	-6.9	0.5	1.61	646	15
10Ca29b_63	0.0403	39	0.00131	10.5	1.46717	1.88684	10	0.282106	22	0.282072	5.9	0.8	1.51	1383	41
10Ca29b_64	0.1441	127	0.00394	26.8	1.46708	1.88702	15	0.282205	20	0.282126	0.7	0.7	1.54	1071	25
10Ca29b_66	0.0327	32	0.00107	9.2	1.46708	1.88699	14	0.281934	18	0.281901	4.6	0.6	1.75	1593	22
10Ca29b_70	0.0583	49	0.00219	13.2	1.46714	1.88697	11	0.282327	20	0.282300	-2.1	0.7	1.37	673	15
10Ca29b_71	0.0192	16	0.00061	3.7	1.46713	1.88699	17	0.281960	17	0.281944	1.4	0.6	1.76	1385	30
10Ca29b_73	0.0310	27	0.00092	5.8	1.46711	1.88707	13	0.282193	17	0.282182	-6.7	0.6	1.61	653	15
10Ca29b_78	0.0285	26	0.00110	7.7	1.46710	1.88693	14	0.282416	19	0.282403	1.1	0.7	1.18	655	14
10Ca29b_81	0.0389	33	0.00147	9.5	1.46714	1.88697	14	0.282416	17	0.282398	0.4	0.6	1.20	629	28
10Ca29b_86	0.0283	26	0.00084	5.8	1.46715	1.88691	8	0.282149	20	0.282130	3.7	0.7	1.48	1199	34
10Ca29_98	0.0228	20	0.00091	8.1	1.46713	1.88699	14	0.282243	29	0.282232	-5.3	1.0	1.52	641	13
10Ca29_103	0.0577	53	0.00196	14.9	1.46714	1.88698	12	0.282407	42	0.282382	1.4	1.5	1.20	708	24
10Ca29_107	0.0329	38	0.00113	12.6	1.46717	1.88686	14	0.282285	22	0.282270	-2.8	0.8	1.42	662	15
10Ca29_108	0.0580	63	0.00192	17.9	1.46715	1.88691	19	0.282255	26	0.282225	-1.5	0.9	1.45	673	26
10Ca29_110	0.0225	21	0.00074	4.8	1.46713	1.88699	16	0.281297	26	0.281270	-10.3	0.9	2.84	1919	23
10Ca36_8	0.0164	16	0.00060	4.7	1.46718	1.88682	14	0.282513	25	0.28251	4.3	0.9	1.0	632	8
10Ca36_42	0.0330	29	0.00120	8.6	1.46713	1.88700	12	0.282517	25	0.28250	4.4	0.9	1.0	647	8
10Ca36_44	0.0185	15	0.00073	4.8	1.46714	1.88698	14	0.282547	23	0.28254	5.8	0.8	0.9	650	7
10Ca36_54	0.0256	27	0.00094	9.2	1.46720	1.88675	15	0.282514	21	0.28250	4.4	0.7	1.0	643	8
10Ca36_58	0.0295	25	0.00104	7.1	1.46718	1.88680	13	0.282506	20	0.28249	3.4	0.7	1.0	625	9
10Ca36_59	0.0325	32	0.00124	9.2	1.46715	1.88694	15	0.282542	30	0.28253	4.9	1.1	0.9	627	11
10Ca36_61	0.0352	31	0.00117	7.8	1.46717	1.88686	13	0.282524	21	0.28251	4.5	0.7	1.0	639	8
10Ca36_79	0.0246	23	0.00089	6.8	1.46720	1.88675	14	0.282508	21	0.28250	4.2	0.8	1.0	643	9
10Ca36_92	0.0252	24	0.00091	6.2	1.46722	1.88667	14	0.282501	25	0.28249	4.5	0.9	1.0	667	9
10Ca36_102	0.0279	24	0.00103	6.4	1.46718	1.88680	15	0.282544	23	0.28253	5.5	0.8	0.9	648	9
10Ca36_105	0.0354	40	0.00130	12.4	1.46718	1.88682	16	0.282538	21	0.28252	5.7	0.7	0.9	674	12
10Ca43C_42	0.0414	37	0.00137	10.0	1.46722	1.88667	15	0.282259	28	0.28224	-4.7	1.0	1.5	646	14
10Ca43C_43	0.0408	40	0.00145	12.8	1.46716	1.88690	11	0.282265	23	0.28225	-3.7	0.8	1.5	681	12
10Ca43C_48	0.0316	32	0.00111	8.9	1.46722	1.88665	9	0.282411	28	0.28240	1.3	1.0	1.2	668	19
10Ca43C_50	0.0185	15	0.00061	4.0	1.46722	1.88666	16	0.282243	16	0.28224	-4.6	0.6	1.5	656	12
10Ca43C_54	0.0245	24	0.00087	7.4	1.46719	1.88678	13	0.282143	28	0.28213	-9.5	1.0	1.7	610	15
10Ca43C_57	0.0177	14	0.00058	3.6	1.46719	1.88677	15	0.282230	19	0.28222	-5.3	0.7	1.5	647	12
10Ca43C_59	0.0305	33	0.00110	11.3	1.46721	1.88668	11	0.282252	30	0.28224	-4.2	1.1	1.5	673	11
10Ca43C_63	0.0266	24	0.00083	6.0	1.46721	1.88668	15	0.282203	21	0.28219	-4.5	0.7	1.6	906	15
10Ca43C_66	0.0286	24	0.00096	6.1	1.46724	1.88660	19	0.282253	17	0.28224	-3.3	0.6	1.5	727	15
10Ca43C_72	0.0359	30	0.00116	7.5	1.46721	1.88668	16	0.282278	16	0.28226	-3.2	0.6	1.4	676	16
10Ca43C_76	0.0265	25	0.00090	7.3	1.46723	1.88662	16	0.282254	17	0.28224	-3.8	0.6	1.5	684	13
10Ca43C_89	0.1056	97	0.00338	24.5	1.46721	1.88669	13	0.282333	22	0.28229	-1.7	0.8	1.4	707	15
10Ca43C_93	0.0148	13	0.00050	3.4	1.46723	1.88663	13	0.282216	26	0.28221	-4.8	0.9	1.5	688	13
10Ca43D_5	0.0231	19	0.00084	5.4	1.46723	1.88664	20	0.282233	17	0.28222	-3.1	0.6	1.5	770	11
10Ca43D_6	0.0465	55	0.00153	15.3	1.46719	1.88676	17	0.282264	27	0.28225	-4.6	0.9	1.5	666	15
10Ca43D_10	0.0064	6	0.00022	1.9	1.46719	1.88677	14	0.280993	28	0.28098	-1.6	1.0	3.0	2789	23
10Ca43D_13	0.0384	43	0.00137	14.1	1.46721	1.88668	6	0.282292	278	0.28228	-4.2	9.8	1.4	622	14
10Ca43D_14	0.0200	19	0.00065	5.3	1.46721	1.88668	19	0.282114	17	0.28210	2.7	0.6	1.5	1220	25
10Ca43D_17	0.0252	21	0.00083	5.8	1.46716	1.88689	16	0.282248	22	0.28224	-3.7	0.8	1.5	694	12
10Ca43D_20	0.0087	15	0.00031	5.2	1.46716	1.88690	9	0.281427	27	0.28141	-1.0	0.9	2.5	2106	30
10Ca43D_28	0.0233	20	0.00075	4.7	1.46718	1.88680	18	0.282216	21	0.28221	-5.2	0.7	1.5	678	12
10Ca43D_29	0.0535	49	0.00173	13.2	1.46717	1.88685	17	0.282256	18	0.28223	-4.6	0.6	1.5	661	12
10Ca43D_30	0.0161	13	0.00053	3.3	1.46722	1.88665	15	0.282402	19	0.28239	0.9	0.7	1.2	624	12
10Ca43D_32	0.0444	73	0.00143	22.4	1.46719	1.88676	18	0.282169	18	0.28214	4.9	0.6	1.4	1370	30
10Ca43D_33	0.0161	13	0.00054	3.3	1.46722	1.88666	18	0.282208	16	0.28220	-0.1	0.6	1.5	976	15
10Ca43D_35	0.0231	21	0.00078	5.8	1.46720	1.88675	14	0.282221	16	0.28221	-6.1	0.6	1.6	631	14
10Ca43D_40	0.0217	19	0.00072	5.0	1.46721	1.88671	17	0.282148	25	0.28214	-7.9	0.9	1.7	663	14
10Ca43D_41	0.1272	142	0.00385	36.7	1.46721	1.88670	25	0.282258	17	0.28221	-5.0	0.6	1.5	684	15
GHa_4	0.0231	21	0.00083	6.2	1.46714	1.88698	11	0.282152	18	0.28214	-10.7	0.6	1.7	549	7
GHa_5	0.0316	28	0.00111	8.1	1.46716	1.88690	9	0.281636	27	0.28160	1.2	1.0	2.2	1919	27
GHa_7	0.0122	10	0.00041	2.7	1.46721	1.88669	15	0.281025	17	0.28101	-13.9	0.6	3.2	2468	11
GHa_8	0.0314	26	0.00106	6.8	1.46717	1.88687	14	0.282063	15	0.28205	-13.9	0.5	1.9	553	7
GHa_10	0.0289	23	0.00111	6.8	1.46714	1.88695	14	0.282293	15	0.28228	-2.2	0.5	1.4	704	11
GHa_10	0.0284	23	0.00106	6.4	1.46716	1.88688	13	0.282253	25	0.28225	-18.8	0.9	1.7	704	11
GHa_13	0.0361	58	0.00121	18.8	1.46716	1.88689	13	0.281917	16	0.28188	1.6	0.6	1.8	1556	28
GHa_14	0.0113	10	0.00040	2.5	1.46714	1.88697	16	0.281660	23	0.28165	-9.7	0.8	2.3	1488	21
GHa_15	0.0207	18	0.00081	5.3	1.46713	1.88699	16	0.282206	16	0.28219	9.3	0.6	1.3	652	6
GHa_16	0.0345	28	0.00107	6.7	1.46716	1.88690	16	0.281698	19	0.28169	-25.0	0.7	2.6	1480	37
GHa_17	0.1179	113	0.00385	28.9	1.46718	1.88683	14	0.281717	25	0.28162	-10.4	0.9	2.4	2318	18
GHa_18	0.0567	48	0.00195	13.4	1.46718	1.88683	10	0.282355	23	0.28234	-4.6	0.8	1.4	552	7
GHa_19	0.0278	29	0.00083	7.4	1.46714	1.88695	16	0.281332	22	0.28131	-16.4	0.8	2.9	1961	42
GHa_20	0.0120	11	0.00041	2.9	1.46715	1.88695	15	0.281701	23	0.28169	-2.9	0.8	2.2	1486	37
GHa_21	0.0234	25	0.00074	6.9	1.46713	1.88699	13	0.281060	21	0.28104	-30.3	0.7	3.5	2688	20
GHa_23	0.0374	47	0.00106	11.8	1.46713	1.88702	18	0.281101	22	0.28106	-11.1	0.8	3.1	2602	12
GHa_26	0.0166	19	0.00055	5.3	1.46716	1.88690	14	0.281664	19	0.28165	-9.5	0.7	2.3	1635	91
GHa_30	0.0279	26	0.00091	6.7	1.46713	1.88701	13	0.282115	17	0.28210	2.2	0.6	1.6	1191	31
GHa_32	0.0340	30	0.00095	6.6	1.46715	1.88692	15	0.280979	19	0.28094	-17.6	0.7	3.4	2588	44
GHa_33	0.0141	12	0.00047	3.0	1.46715	1.88693	17	0.281724	27	0.28171	-8.3	1.0	2.2	1531	43
GHa_34	0.0336	50	0.00109	12.5	1.46718	1.88681	12	0.281111	21	0.28106	-4.2	0.8	3.0	2716	14
GHa_35	0.0296	29	0.00089	7.8	1.46717	1.88686	15	0.281092	18	0.28105	-4.5	0.7	3.0	2681	12
GHa_36	0.0897	77	0.00266	17.4	1.46719	1.88677	15	0.282553	18	0.28253	2.9	0.6	1.0	570	7
GHa_37	0.0111	9	0.00036	2.2	1.46714	1.88696	15	0.281671	18	0.28166	-9.2	0.7	2.3	1542	30
GHa_38	0.0287	36	0.00092	10.2	1.46722	1.88664	14	0.282197	26	0.28218	-2.4	0.9	1.5	911	10
GHa_39	0.1085	177	0.00291	42.2	1.46716	1.88691	15	0.281141	25	0.28101	-9.8	0.9	3.2	2659	11
GHa_41	0.0111	9	0.00040	2.4	1.46719	1.88677	17	0.281731	16	0.28172	-5.6	0.6	2.2	1605	33
GHa_43	0.0153	13	0.00045	2.9	1.46715	1.88694	10	0.281672	19	0.28166	-6.7	0.7	2.3	1521	66
GHa_45	0.0217	18	0.00083	5.6	1.46717	1.88685	14	0.281608	25	0.28158	3.2	0.9	2.2	2101	16
GHa_48	0.0142	12	0.00048	2.9	1.46715	1.88693	16	0.281728	18	0.28171	-5.5	0.6	2.2	1514	27
GHa_49	0.0318	29	0.00112	8.3	1.46714	1.88697	16	0.281073	14	0.28102	-11.2	0.5	3.2	2532	12
GHa_50	0.0150	12	0.00050	3.2	1.46716	1.88691	11	0.281276	23	0.28126	-21.7	0.8	3.1	1633	40
GHa_51	0.0161	13	0.00052	3.3	1.46719	1.88678	14	0.281727	16	0.28172	-11.2	0.6	2.3	1581	128
GHa_53	0.0217	18	0.00065	4.0	1.46716	1.88689	17	0.281596	17	0.28158	-8.2	0.6	2.4	1549	48
GHa_54	0.0297	25	0.00092	6.5	1.46716	1.88687	15	0.281304	21	0.28127	-10.5	0.8	2.8	1912	21
GHa_55	0.0190	21	0.00060	5.9	1.46714	1.88698	14	0.281043	19	0.28102	-7.6	0.7	3.1	2648	15
GHa_58	0.0144	12	0.00042	2.7	1.46715	1.88694	17	0.281663	17	0.28165	-7.5	0.6	2.3	1556	40
GHa_61	0.0169	14	0.00057	3.7	1.46717	1.88684	17	0.281039	18	0.28102	-14.3	0.6	3.2	2451	18
GHa_64	0.0144	13	0.00046	3.1	1.46714	1.88697	14	0.281738	16	0.28173	-5.4	0.6	2.2	1637	43
GHa_65	0.0192	18	0.00061	4.4	1.46720	1.88672	13	0.281608	23	0.28158	2.8	0.8	2.2	2104	21
GHa_71	0.0226	26	0.00076	6.9	1.46719	1.88677	15	0.281400	16	0.28137	-6.8	0.6	2.6	2033	17
GHa_72	0.0130	11	0.00047	2.9	1.46716	1.88689	15	0.281718	17	0.28171	-6.1	0.6	2.2	1517	25
GHa_75	0.0190	16	0.00061	3.8	1.46712	1.88679	15	0.282143	24	0.28213	2.2	0.9	1.5	1215	23
GHa_77	0.0218	27	0.00079	9.4	1.46718	1.88682	13	0.281758	27	0.28174	-5.4	1.0	2.2	1511	18
GHa_78	0.0140	12	0.00047	2.9	1.46713	1.88699	15	0.281729	19	0.28172	-6.4	0.7	2.2	1520	37
GHa_79	0.0133	11	0.00048	2.9	1.46716	1.88688	14	0.281591	16	0.28157	2.2	0.6	2.2	2104	51
GHa_80	0.0138	11	0.00047	2.9	1.46715	1.88692	13	0.281687	18	0.28168	-8.5	0.6	2.3	1675	76
GHa_81	0.0120	10	0.00045	2.8	1.46718	1.88683	15	0.281584	18	0.28157	0.3	0.6	2.3	1923	23
GHa_84	0.0260	38	0.00093	12.9	1.46718	1.88680	15	0.281066	16	0.28102	-10.3	0.6	3.1	2508	12
GHa_86	0.0131	11	0.00045	3.1	1.46718	1.88680	12	0.281716	22	0.28170	-7.5	0.8	2.2	1498	32
GHa_87	0.0177	18	0.00056	4.8	1.46717	1.88686	15	0.281610	19	0.28159	-8.1	0.7	2.4	1622	30
GHa_89	0.0133	11	0.00045	2.7	1.46717	1.88686	15	0.281721	19	0.28171	-5.6	0.7	2.2	1505	33
GHa_92	0.0090	7	0.00031	1.9	1.46719	1.88679	14	0.282336	16	0.28233	-3.2	0.6	1.3	586	8
GHa_93	0.0125	12	0.00049	3.5	1.46716	1.88690	12	0.281584	20	0.28157	3.2	0.7	2.2	2134	14
GHa_94	0.0173	15	0.00053	3.7	1.46713	1.88699	13	0.281246	22	0.28123	-10.4	0.8	2.9	2113	13
Plesovice (n=16)	0.0060	25	0.00014	6	1.46717	1.88675	21	0.282477	25	0.282476	-3.4	0.9	1.16	338	3
GJ-1, n=22	0.0078	10	0.00027	2	1.46717	1.88682	12	0.282005	20	0.282002	-14.2	0.7	1.97	606	6
JMC 475 (n=8)					1.46716	1.88665	15	0.282155	8
Quoted uncertainties (absolute) relate to the last quoted figure. The effect of the inter-element fractionation on the Lu/Hf was estimated to be about 6 % or less based on analyses of the GJ-1 and Plesovi?e zircon. Accuracy and reproducibilty was checked by repeated analyses (n = 57 and 10, respectively) of reference zircon GJ-1 and Plesovi?e (data given as mean with 2 standard deviation uncertai…
(a) 176Yb/177Hf = (176Yb/173Yb)true x (173Yb/177Hf)meas x (M173(Yb)/M177(Hf))b(Hf), b(Hf) = ln(179Hf/177Hf true / 179Hf/177Hfmeasured )/ ln (M179(Hf)/M177(Hf) ), M=mass of respective isotope. The 176Lu/177Hf were calculated in a similar way by using the 175Lu/177Hf and �Yb).
(b) Mean Hf signal in volt.
(c) Uncertainties are quadratic additions of the within-run precision and the daily reproducibility of the 40ppb-JMC475 solution. Uncertainties for the JMC475 quoted at 2SD (2 standard deviation).
(d) Initial 176Hf/177Hf and eHf calculated using the apparent Pb-Pb age determined by LA-ICP-MS dating (see column f), and the CHUR parameters:
176Lu/177Hf = 0.0336, and 176Hf/177Hf = 0.282785 (Bouvier et al., 2008).
(e) two stage model age in billion years using the measured 176Lu/177Lu of each spot (first stage = age of zircon), a value of 0.0113 for the average continental crust (second stage), and a juvenile crust (NC) 176Lu/177Lu and 176Hf/177Hf of 0.0384 and 0.28314, respectively.
(f) apparent Pb-Pb age determined by LA-ICP-MS
